# Supplementary material for: Sirt1 sustains female fertility by slowing age‐related decline in oocyte quality required for post‐fertilization embryo development
Source: PubMed Central journal article supplement (PMC7511857; doi:10.1111/acel.13204), 2020-07-30

**(a)**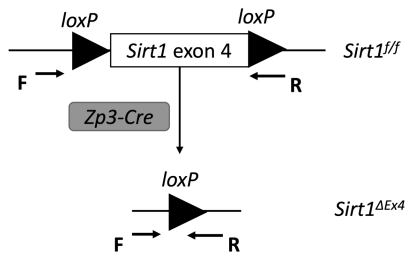**(b)**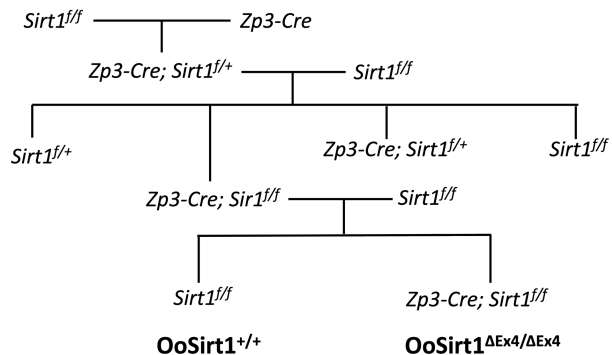**(c)**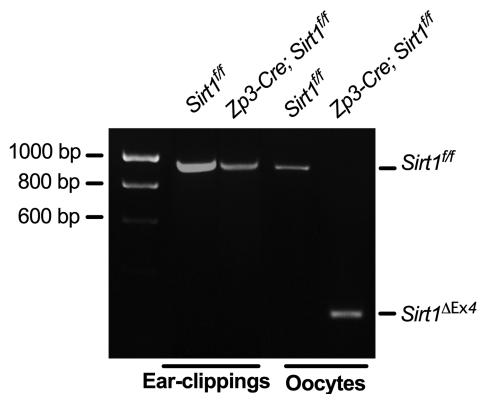**(d)**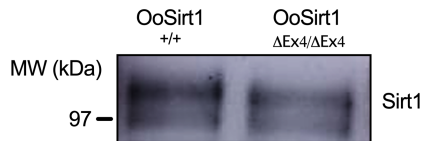

Supplement: ACEL-19-e13204-s001.pdf [file ACEL-19-e13204-s001.pdf]
