# Supplementary material for: Sirt1 sustains female fertility by slowing age‐related decline in oocyte quality required for post‐fertilization embryo development
Source: PubMed Central journal article supplement (PMC7511857; doi:10.1111/acel.13204), 2020-07-30

## Caspase-3

OoSirt1<sup>+/+</sup>

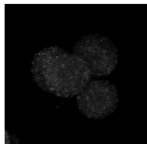

OoSirt1<sup>ΔEx4/ΔEx4</sup>

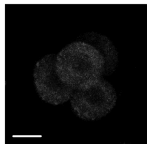

+ FK866 (0.25 nM)

- OoSirt1<sup>+/+</sup>
- OoSirt1<sup>ΔEx4/ΔEx4</sup>

Fluorescence intensity  
of Caspase-3 (A.U.)

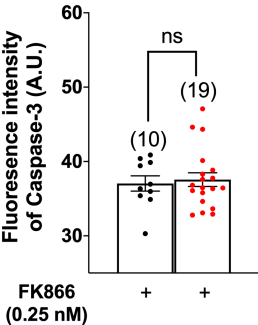

Supplement: ACEL-19-e13204-s003.pdf [file ACEL-19-e13204-s003.pdf]
